# Supplementary material for: Advances in the medical management of skin and soft tissue infections
Source: HighWire-hosted journal article supplement (doi:10.1136/bmj.i6004), 2016-12-14
Supplement: bmj.i6004.pdf [file bmj.i6004.pdf]

# 皮肤及软组织感染治疗进展

## Advances in the medical management of skin and soft tissue infections

来源:BMJ 2016;355:i6004 doi: 10.1136/bmj.i6004

### 摘要

门诊与住院患者中,皮肤及软组织感染是最常见的感染性疾病。由于细菌对抗生素的耐药逐渐增多,抗生素经验性治疗越来越困难。此外,最新的皮肤及软组织感染指南由美国传染病学会于2014年发表,距今已有2年。目前治疗皮肤及软组织感染性疾病已有新型抗生素可供使用,而更多的药物仍在研发中。该综述总结了那些新的或仍在完善的,以及有老药新用潜能的抗生素的治疗证据。该文探讨了这些治疗方法的临床疗效。

控制门诊与住院患者的皮肤及软组织感染 (skin and soft tissue infections, SSTIs) 具有挑战性。其发病率是肺炎与泌尿系感染总和的2倍<sup>1</sup>。同时,对已有抗生素耐药仍是问题,其中葡萄球菌耐药最为显著。

2010年,美国食品药品监督管理局(FDA)发表的指南中,将较严重的SSTIs的专业术语由复杂的皮肤及皮肤结构感

染 (complicated skin and skin structure infections, cSSSIs) 改为急性细菌性皮肤及皮肤结构感染 (acute bacterial skin and skin structure infections, ABSSSIs)。2010年版指南草案于2013年完成,这是继1998年FDA为药物工业提供临床试验指南颁布文件后首次更新。cSSSIs定义为涉及更深层的软组织感染,需要有效的外科干预;或有重大基础疾病,对治疗反应复杂的患者出现的感染<sup>2</sup>。ABSSSI定义为蜂窝织炎/丹毒、伤口感染,以及大的皮肤脓肿(皮损面积 $\geq 75 \text{ cm}^2$ )<sup>2-3</sup>, ABSSSI不包括较轻的SSTIs(即脓疱疮及较小的皮肤脓肿)。2014年美国传染病协会(Infectious Diseases Society of America, IDSA)颁布的SSTI治疗指南并没有使用ABSSSI的定义,而是通过有无化脓以及疾病的严重程度来区别SSTIs<sup>4</sup>。

抗生素耐药使得经验性选择抗生素变得困难;选择明确的治疗方案不切实

Sarah L McClain,<sup>1</sup>  
Jefferson G Bohan,<sup>1</sup>  
Dennis L Stevens<sup>1,2</sup>

<sup>1</sup>Boise Veterans Affairs Medical Center, 500 W Fort St, Boise, ID 83702, USA  
<sup>2</sup>University of Washington School of Medicine, Seattle, WA 98195, USA

Correspondence to: S L McClain sarah.mcclain@va.gov

王琪译  
南京医科大学  
附属无锡市  
第二人民医院  
皮肤科  
吴晓初 校  
中华皮肤科杂志  
编辑部

际,尤其是在无微生物学诊断的情况下。最近,一些抗生素被批准用于治疗 SSTIs,更多的药物也在准备中。新药使用限定条件缺乏针对其临床疗效的统一指南。因此,证据对经验性或明确性抗生素治疗方案的选择十分重要。

该综述探讨了那些新的或仍在完善的,以及有老药新用潜能的抗生素的治疗证据。该文主要讨论成年人 SSTIs 的治疗,儿童使用新型抗生素的数据也有所呈现。

## 发病率与患病率

2005 至 2010 年,美国门诊与住院患者 SSTIs 的发病率相对稳定,每年每千人有 47.9~48.5 人发病。这些 SSTIs 病例中,95% 于门诊治疗,60% 被诊断为脓肿或蜂窝织炎,链球菌及葡萄球菌是最主要的致病菌<sup>5</sup>。在美国,社区相关的耐甲氧西林金黄色葡萄球菌(MRSA, USA300 株)尤为重要,这种细菌导致社区治疗的 SSTIs 有很高的化脓感染率。2000 至 2013 年,SSTIs 占 MRSA USA300 株感染的 62.9%,急需更多治疗方法以供选择<sup>6</sup>。美国 MRSA 的患病率与其他国家不同,在英国及北欧等 MRSA 患病率较低的地方,SSTIs 治疗指南与 IDSA 指南相比,有很大不同。其更强调  $\beta$  内酰胺类抗生素对甲氧西林敏感金黄色葡萄球菌(MSSA)治疗的有效性<sup>7</sup>。

## 诊断注意事项

在可能存在多种病原体感染时,流行病学资料对 SSTIs 的诊断起到重要作用<sup>4</sup>。详尽准确的病史可以为临床及微生物学诊断及治疗提供帮助。了解患者的免疫状态、地理位置、旅游史、动物接触史、近期外伤史及手术史对排除诊断尤为重要。重视临床表现,并了解皮肤与软组织的解剖学关系,对作出正确的诊断很有帮助<sup>4</sup>。对于有免疫缺陷及有明显系统感染症状(如心动过速、血压低或器官功能紊乱)的患者,可以使用组织活检或针吸组织活检术这种侵入性的检查方式<sup>4</sup>。影像学证据可以帮助判断感染的深度以及是否出现气体及脓肿。近年,外科清创术或探查术在诊断及治疗方面也很重要,尤其是在免疫缺陷或有感染坏死的患者中<sup>4</sup>。更多明确的诊断学信息可参考 IDSA 颁布的 SSTI 指南全文。

## 检索作用词汇

### 药物相关词汇

自由词 —— “tedizolid” “brilacidin” “oral sodium fusidate” “sodium fusidate” “delafloxacin”

MESH 词 —— “anti-infective agents” “fosfomycin” “fusidic acid”

MESH 增补概念词汇 —— “dalbavancin” “oritavancin” “iclaprim” “ABT 492” “omadacycline” “torezolid phosphate”

### 适应证相关词汇

自由词 —— “SSTI” “skin and soft tissue infection” “acute bacterial skin and skin structure infection” “ABSSSI” “major cutaneous abscess”

MESH 词 —— “soft tissue infections” “skin diseases infectious” “cellulitis” “paronychia” “skin diseases, bacterial” “wound infection” “impetigo” “cervicofacial actinomycosis” “bacillary angiomatosis” “ecthyma” “erysipelas” “erythema chronicum migrans” “erythrasma” “granuloma inguinale” “pinta” “rhinoscleroma” “staphylococcal scalded skin syndrome” “furunculosis” “carbuncle” “cutaneous syphilis” “erythema induratum” “lupus vulgaris” “yaws”

## 方法

我们进行了结构化的 PubMed 检索,以找到 2006 年 1 月 1 日至 2016 年 3 月 1 日发表的原始文献。使用适应证相关、药物相关的自由词检索、医学主题词检索(MESH)及 MESH 增补概念表检索。使用过滤器筛选出临床试验、前瞻性及回顾性队列研究、指南、综述,共 2 400 篇文章。排除标准依次为标题、摘要及全文。对参考表中的相关文章进行了筛选。热点主题包括药理学、药代动力学、药效学、剂量及不良反应, FDA/欧洲药品管理局(European Medicines Agency, EMA)批准的适应证及自 2014 年认可的药物相关结果或 II 期及 III 期临床试验得到的药物相关结果。我们也搜索了临床试验数据库。

## 治疗概述

SSTIs 治疗一般分为两种情况:化脓性感染(例如:疖、痈及脓肿)以及非化脓性感染(例如:蜂窝织炎、丹毒)。在复发性 SSTIs 或轻型非复杂性 SSTIs (如大疱型或非大疱型脓疱疮)的治疗中,局部外用抗生素主要起到鼻腔微生物去定植作用<sup>4</sup>。除了切

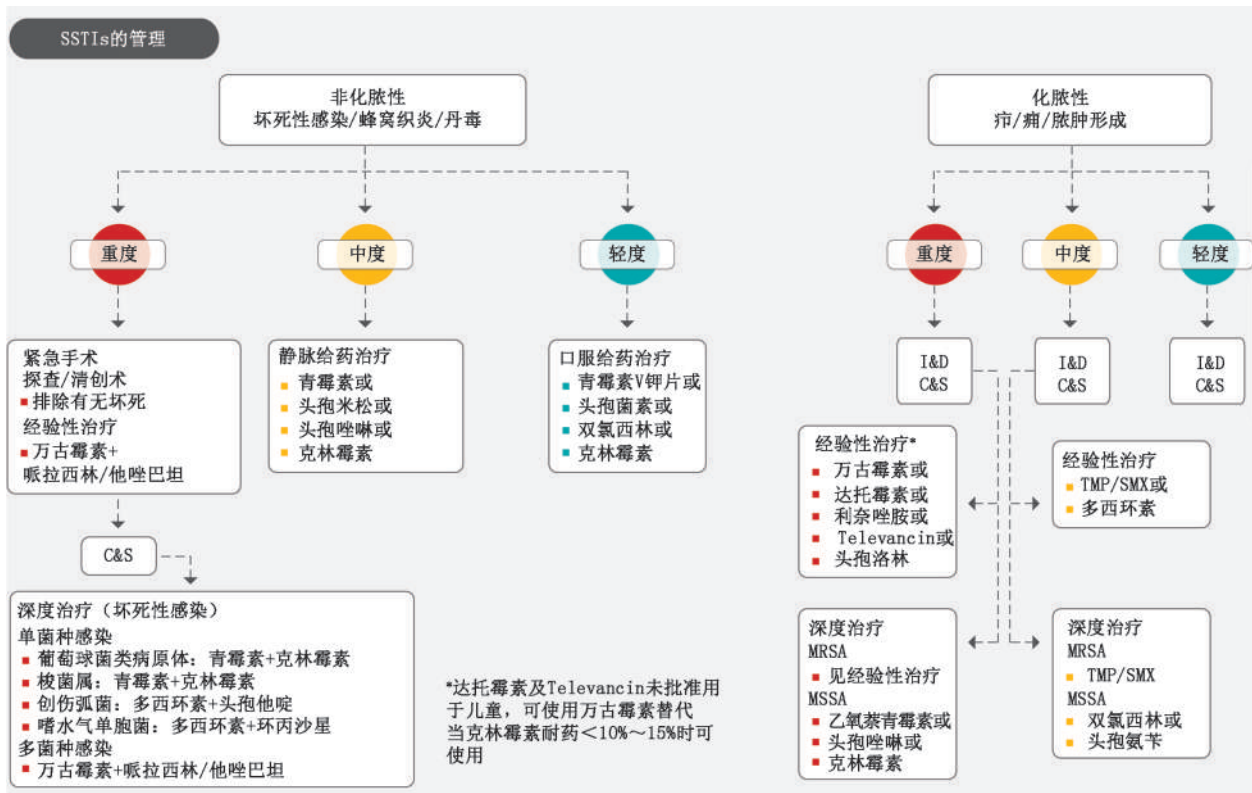

图1 化脓性皮肤及软组织感染(SSTIs)的治疗

SSTIs——轻度感染:化脓SSTI,有切开引流指征;中度感染:有系统性感染指征;重度感染:切开引流+口服抗生素治疗无效,有系统感染症状[体温>38℃,心率增快(>90次/min),呼吸急促(>24次/min),白细胞数异常(>12 000或<4 000 细胞/μl)]或免疫功能不全患者。非化脓性SSTIs——轻度感染:典型的蜂窝织炎/丹毒;中度感染:典型的蜂窝织炎/丹毒伴系统感染症状;重度感染:口服抗生素治疗,系统感染症状(同上),免疫功能不全,有深度感染表现如大疱、皮肤脱落、低血压、器官功能紊乱。C&S:细菌培养及药敏;I&D:切开引流;MRSA:耐甲氧西林金黄色葡萄球菌;MSSA:甲氧西林敏感金黄色葡萄球菌;TMP/SMX=甲氧苄氨嘧啶/磺胺甲噁唑。首次出现于美国传染病协会发表的“皮肤与软组织感染诊断与治疗实践指南:2014年更新”;经牛津大学出版社许可。

开引流或局部外用治疗,一些SSTIs患者需要系统抗生素治疗。

IDSA提供的治疗策略(图1)中首先要考虑有无化脓。根据此策略,中度化脓性感染要求经验性口服抗葡萄球菌抗生素治疗,同时需要切开引流,细菌培养加药敏试验。重度化脓性感染时,将口服抗生素改为静脉注射<sup>2</sup>。轻度非化脓性感染需要口服抗链球菌感染。中度非化脓性感染时,将口服抗生素改为静脉注射。重度非化脓性感染,包括坏死性筋膜炎,需要使用广谱抗生素,并联合毒素抑制及手术干预<sup>2</sup>。

### 新型抗生素制剂

#### 达巴万星(Dalbavancin)

属性及抗菌活性

达巴万星是一种半合成脂糖肽类抗生素,可与

细菌细胞壁上的聚糖肽末端的D-丙氨酰-D-丙氨酸残基相连,因此可阻止聚糖肽合成过程中转肽及转糖基作用,抑制细胞壁的合成<sup>8</sup>。除此之外,达巴万星具有亲脂性侧链,可与细菌的细胞膜相结合,提高效能并延长其半衰期。

体外研究中,达巴万星对革兰阳性菌有抗菌活性,包括金黄色葡萄球菌(MSSA,MRSA)、凝固酶阴性葡萄球菌(coagulase negative staphylococci, CoNS)、链球菌及肠球菌<sup>9</sup>。在体外,达巴万星对少见革兰阳性菌也有抗菌作用,包括李斯特菌、微球菌、棒状杆菌<sup>10</sup>。达巴万星对金黄色葡萄球菌的体外抗菌活性是达托霉素的8倍,万古霉素的16倍<sup>11</sup>。万古霉素的敏感性可替代达巴万星的敏感性使用,准确率达97.7%~100%<sup>12-13</sup>。此外,对万古霉素敏感性降低的病原体在体外对达巴万星敏感,如万古霉素中度耐药性金黄色葡萄球菌(vancomycin intermediate *S aureus*, VISA),虽然其对



达巴万星的最小抑菌浓度 (most minimum inhibitory concentrations, MICs) 超过 FDA 设定的临界值  $0.12 \mu\text{g/ml}^{14}$ 。

尽管达巴万星有更高的效能, 并因可穿过细菌细胞壁增多了与 D-丙氨酰-D-丙氨酸的结合位点, 但仍有报道  $<1\%$  的分离株表现葡萄球菌对达巴万星耐药, 此与万古霉素耐药性相似<sup>11,14</sup>。近期发现, 达巴万星对携带 VanB 而非 VanA 的肠球菌有抑菌活性, VanB 使得在美国肠球菌对大多数万古霉素耐药<sup>14</sup>。

FDA 与 EMA 分别于 2014 年及 2015 年批准达巴万星治疗 ABSSEI。初始剂量为 1 000 mg, 7 天后再给予 500 mg。2016 年的一项随机试验证明, 1 500 mg 单次给药疗效不劣于 2 次治疗方案<sup>9,15</sup>。

#### 药代动力学和给药

达巴万星的药代动力学呈剂量依赖性线性关系。达巴万星进入人体后广泛分布于各个组织中, 与蛋白质广泛并可逆的结合, 结合率为 93%。在尿液中可维持治疗浓度 7 天<sup>9</sup>。达巴万星与细胞色素 P450 系统无相互作用, 与重要药物无相互作用。近三分之一的达巴万星以原型经尿液排泄, 初始剂量 70 天后, 达巴万星在粪便排泄 20%。达巴万星的终末半衰期为 346 小时, 使得单次给药或 2 次给药可以达到治疗作用。肾功能正常 (肌酐清除率  $\geq 30 \text{ ml/min}$ ) 或行血液透析的患者无需调整剂量<sup>9</sup>。

有意义的是, 肌酐清除率  $<30 \text{ ml/min}$ 、未接受血液透析的患者, 其达巴万星的血药浓度-时间曲线下面积更大, 清除率降低, 因此剂量应调整为单次给药 1 125 mg, 2 次给药起始剂量 750 mg, 1 周后给予 375 mg<sup>16</sup>。间歇性血液透析及低渗连续性血液透析患者其达巴万星并没有显著清除。但是在使用高渗透连续性透析肌酐清除率正常的患者中, 达巴万星的清除率与肾清除率相吻合或略高<sup>17</sup>。因肝脏不参与达巴万星的代谢与清除, 肝功能受损的患者无需调整剂量<sup>16</sup>。达巴万星不延长心脏 QT 间期, 对心率、PR 或 QRS 间期无影响<sup>18</sup>。

#### 证据摘要

第一个 III 期、随机双盲达巴万星治疗 SSTIs 的研究于 2005 年发表, 试验对比了达巴万星 2 次给药与利奈唑胺连续 14 天给药的疗效。试验发现, 达巴万星疗效不劣于利奈唑胺, 但不良反应发生率更低<sup>19</sup>。之后进行了两个同为随机、双盲、双模拟多中心的 III 期试验, 即 DISCOVER 1 和 2 (表 1)。共入

组 1 312 例 ABSSEI 患者。试验组: 达巴万星 2 次给药; 对照组: 万古霉素静脉给药  $>3$  天, 之后改为利奈唑胺口服 10~14 天<sup>20</sup>。结果与之前相似, 主要疗效评估终点: 48~72 小时红斑不扩大, 退热, 达巴万星疗效不劣于对照组。与对照组相比, 达巴万星不良反应发生率更低 ( $P=0.5$ )。常见的不良反应包括恶心、头痛及腹泻。不良反应发生的中位数时间为 3 天, 对照组为 4 天<sup>9,20</sup>。与之前的研究相比, DISCOVER 研究中, 入组患者临床症状更严重。其招募限制条件是脓肿形成率  $<30\%$ , 约 50% 的患者患有两种以上系统炎症反应综合征。

达巴万星儿童用药资料有限。一项 I 期临床试验中, 入组儿童为 12~17 岁, 体重  $>60 \text{ kg}$  给予成人剂量 (1 000 mg),  $<60 \text{ kg}$  给予  $15 \text{ mg/kg}^{24}$ 。结果显示, 在儿童中, 每种给药剂量方式都显示较好的耐受性, 但与成人相比, 其作用略低。

#### 临床应用

达巴万星与其他糖肽类抗生素相似, 治疗 ABSSEI 安全有效。其最大优点为治疗方便。但是, 与其他治疗方法相比, 经济因素也需仔细权衡 (表 2)。理想的药物具有以下特征: 单次给药、输注时间短、不需常规检测, 并且无药物-药物相互作用及药物-检验相互作用。达巴万星可避免因静脉给药而住院治疗。达巴万星在以下患者中也很有市场: 依从性差、因居住较远监测困难的静脉用抗生素的门诊患者、有注射类药物滥用史又不愿意中心静脉置管的患者。

### 奥利万星 (Oritavancin)

#### 属性及抗菌活性

奥利万星是一种半合成的脂糖肽类抗生素, 抗菌原理至少有 3 种机制 (mechanisms of action, MOAs)。与其他脂糖肽类抗生素相似, 奥利万星可通过与细菌细胞壁上的聚糖肽末端 D-丙氨酰-D-丙氨酸结合抑制转糖基作用, 从而破坏细胞壁的合成<sup>25</sup>。其可与肽桥片段结合, 抑制转肽作用, 也因为这个原理, 其对万古霉素耐药菌有效。万古霉素对转肽的抑制作用强于转糖基作用<sup>26</sup>。近期发现, 奥利万星可以与细胞膜相互作用, 引起去极化及细胞膜渗透性增加, 最终导致快速的浓度依赖性杀菌作用<sup>25</sup>。奥利万星可以作用于静止状态的细菌, 例如, 生物膜上的细菌<sup>27</sup>。

奥利万星体外对多种革兰阳性菌有效。包括

金黄色葡萄球菌[MSSA、MRSA、VISA、万古霉素耐金黄色葡萄球菌(VRSA)]、CoNS、链球菌、肠球菌,包括VRE<sup>28</sup>。此外,奥利万星体外对李斯特菌、微球菌、棒状杆菌亦有效。万古霉素的敏感性可替代奥利万星的敏感性使用,交叉敏感性达99.4%<sup>29</sup>。然而,肠球菌对万古霉素耐药并不能准确预测,奥利万星对其亦不敏感<sup>30-31</sup>。奥利万星的耐药极为少见<sup>31</sup>。虽然体外试验显示,金黄色葡萄球菌对奥利万星的敏感性低于万古霉素,MIC值常超过标准的实验室临界值,提示临床应用时应谨慎使用<sup>26</sup>。

#### 药代动力学和给药

FDA与EMA分别于2014年及2015年批准奥利万星治疗ABSSSI。奥利万星治疗剂量为单次静脉给药1 200 mg。其药代动力学为线性关系,可广泛地分布于各种组织中<sup>32</sup>。血浆蛋白可结合85%奥利万星<sup>32</sup>。

奥利万星的清除首先发生于网状内皮组织系统,此组织排泄缓慢。2周后收集排泄物发现,粪便排泄1%,尿液排泄5%<sup>26,32</sup>。半衰期245小时,因此,单次给药有效<sup>33</sup>。轻中度肾功能或肝功能受损无需调整剂量。奥利万星未在严重肝肾功能受损患者中评估,但在低或高流量血液透析或持续性肾脏替代治疗患者中并未显著清除<sup>32,34</sup>。奥利万星不影响心脏QT间期<sup>35</sup>。

奥利万星可非特异性微弱抑制CYP2C9及CYP2C19。并可诱导CYP3A4及CYP2D6。从而导致药物相互作用,其中最显著的为华法林(血药浓度-时间曲线面积均值提高31%)<sup>32</sup>。其可与磷脂试剂结合,与常用的凝血试验发生药物-检验相互作用。包括活化部分凝血酶原时间(activated partial thromboplastin time, aPTT)、活化凝血时间、凝血酶原时间/国际标准化比率<sup>32</sup>。因其可延长aPTT值,奥利万星给药120小时内禁用普通肝素,奥利万星给药的120小时内需监测aPTT,建议行非磷脂依赖性凝血检测,如Xa因子试验<sup>32</sup>。

#### 证据摘要

对奥利万星疗效研究的两个临床试验(SOLO I及II)皆为随机双盲研究。试验组:奥利万星单次静脉给药1 200 mg,对照组:万古霉素1 000 mg或15 mg/kg连续静脉给药7~10天,1天2次。共入组2 000例ABSSSI成人患者<sup>21-22</sup>。主要疗效评估终点标准包括感染停止扩散或皮损面积缩小、退热、

奥利万星给药48~72小时后无需给予紧急抗生素治疗。次要疗效评估终点标准包括治疗结束7~14天后,研究者判定临床治愈;奥利万星给药48~72小时后,减少皮损面积至少20%。两项研究中,所有疗效评估终点均显示奥利万星疗效不劣于万古霉素。常见不良反应包括恶心、头痛、呕吐、腹泻、四肢及皮下脓肿,发生率<3%。奥利万星耐受性好,与万古霉素不良反应发生率相似。在SOLO I中,奥利万星治疗组恶心的发生率更高(并不显著)<sup>21</sup>。

一项儿科I期临床研究招募<18岁的可疑或确诊细菌感染患儿来评估奥利万星的药代动力学,该研究的奥利万星起始剂量为15 mg/kg<sup>36</sup>。

#### 临床应用

奥利万星治疗ABSSSI的地位与其他糖肽类抗生素类似(表1)。其与达巴万星的共同特点是临床应用简便,但必须仔细权衡患者经济及其他因素,选择合适药物治疗(表2)。旧的治疗方案需要毒理学监测,因此,使用奥利万星可以改善并简化患者护理方案。奥利万星对耐药革兰阳性菌作用更强。大量葡萄糖静脉滴注3小时的给药方法使其备受争议,目前输注时间较短的新配方正在研制<sup>37</sup>。一些患者中,出现奥利万星与抗凝药物相互作用也引起关注,长期服用华法林患者使用此药的研究正在进行<sup>38</sup>。

#### 泰地唑胺(Tedizolid)

##### 属性及抗菌活性

泰地唑胺(一种恶唑烷酮前体药)通过内源性磷酸酶作用于磷酸泰地唑胺形成。恶唑烷酮的MOA为:恶唑烷酮与50S亚基的23S核糖体RNA相结合,可阻止70S初始复合物形成,并抑制蛋白质合成<sup>39</sup>。泰地唑胺的抗菌谱类似于利奈唑胺,体外研究具有抑菌杀伤作用,而体内试验表明其对革兰阳性菌(包括MRSA和VRE感染的动物模型)的抗菌作用可能与粒细胞增加有关<sup>40,41</sup>。与利奈唑胺相比,泰地唑胺效能更大,其对葡萄球菌、链球菌和肠球菌具有较低的MIC<sub>50</sub>和MIC<sub>90</sub>值,可能与核糖体结合的亲和力更强有关<sup>39</sup>。尽管泰地唑胺效能增加,利奈唑胺耐药性预示了泰地唑胺的耐药性<sup>42</sup>。然而,泰地唑胺可以抑制一些表达耐药基因(cfr)的葡萄球菌及肠球菌,提示其除了可治疗万古霉素和达托霉素耐药菌引起的感染,还可治疗由利奈唑胺耐药菌株引起的感染<sup>43-44</sup>。

表1 达巴万星、奥利万星、特地唑胺治疗急性细菌性皮肤及皮肤结构感染的Ⅲ期临床试验证据总结

| 试验                                                    | 设计                                                                 | 干预                                                                         | 患者人群                                           | 人口统计学资料                                                                                                                      | 主要评估终点                               | 次要评估终点                   | 统计学分析        | 结果                                                                |
|-------------------------------------------------------|--------------------------------------------------------------------|----------------------------------------------------------------------------|------------------------------------------------|------------------------------------------------------------------------------------------------------------------------------|--------------------------------------|--------------------------|--------------|-------------------------------------------------------------------|
| <b>达巴万星</b>                                           |                                                                    |                                                                            |                                                |                                                                                                                              |                                      |                          |              |                                                                   |
| 随机、双盲、达巴万星每周1次给药与利奈唑胺每日2次给药治疗CSSSIs疗效比较 <sup>19</sup> | 随机双盲双模拟多中心试验, 2003—2004年开展                                         | 第1天给予达巴万星1 000 mg静脉注射,第8天给予1 500 mg比利奈唑胺600 mg/12 h,连用14天                  | <sup>†</sup> CSSSIs的成年患者,同时伴有≥1个系统感染症状         | ITT (n=854): 平均年龄47岁;42%男性;32%脓肿形成;28%蜂窝织炎; mITT(64%, n=550): 89%金黄色葡萄球菌感染; MRSA 51%;5.6%GAS                                 | 治疗完成后随访(14±2)天, dTOC临床成功(不需要使用其他抗生素) | EOT及托西生学反应以及所有反应         | 非劣效性,界值12.5% | 主要评估终点: 88.9%患者对达巴万星有反应, 91.2%对利奈唑胺有反应, CI下限=-7.28%, 满足非劣效性验证标准   |
| DISCOVER-1与ISCOVER-2 <sup>20</sup>                    | 随机双盲双模拟多中心试验, 2011—2012年开展                                         | 第1天给予达巴万星1 000 mg静脉注射,第8天给予1 500 mg比静脉注射万古霉素≥3天,之后口服利奈唑胺10~14天             | <sup>‡</sup> ABSSSIs的成年患者,同时伴有≥1个系统感染症状        | ITT(n=1 312): 平均年龄45岁;63%男性;58%白种人; 25.5%脓肿形成; 53.5%蜂窝织炎, mITT (64%, n=550): 试验开始时51%病例进行病原体分离;77%金黄色葡萄球菌感染,24% MRSA, 11%GAS | 治疗后48~72小时出现早期临床反应(红斑面积不扩大,体温≤36.6℃) | EOT时临床状态; EOT时临床         | 非劣效性,界值10%   | 两个试验合并分析,主要评估终点:达巴万星有效率79.7%比利奈唑胺79.8%, 95% CI-4.5~4.2 满足非劣效性验证标准 |
| <b>奥利万星</b>                                           |                                                                    |                                                                            |                                                |                                                                                                                              |                                      |                          |              |                                                                   |
| SOLO-1 <sup>21</sup>                                  | 随机双盲双模拟多中心试验, 2011—2012年开展                                         | 奥利万星1 200 mg静脉注射给药1次比万古霉素1 000 mg或15 mg/kg连续7~10天,每12小时静脉给药1次              | ABSSSIs的成年患者,同时伴有≥1个系统感染症状                     | mITT (n=954): 平均年龄45岁;63%男性;58%白种人; 29%脓肿形成; 50%蜂窝织炎;感染部位培养阳性率61%;金黄色葡萄球菌感染45%                                               | 皮损不蔓延,面积减小,退热, ECE时不再使用急救抗生素         | PTE时研究者判断临床治愈;皮损面积减小≥20% | 非劣效性,界值10%   | 早期临床评估主要终点:奥利万星有效率82.3%比万古霉素有效率78.9%; 95% CI-1.6~8.4 满足非劣效性验证标准   |
| SOLO-2 <sup>22</sup>                                  | 随机双盲双模拟多中心试验, 2011—2013年开展                                         |                                                                            | ABSSSIs的成年患者,同时伴有≥1个系统感染症状                     | mITT(n=1 005): 平均年龄45岁;68%男性;71%白种人; 32.5%脓肿形成; 30.9%蜂窝织炎;感染部位培养阳性率70%;74%金黄色葡萄球菌感染; 29%MRSA                                 | 皮损不蔓延,面积减小,退热, ECE时不再使用急救抗生素         | PTE时研究者判断临床治愈;皮损面积减小≥20% | 非劣效性,界值10%   | ECE主要疗效结果(mITT):奥利万星有效率80.1%比万古霉素82.9%, 95% CI-7.5~2.0 满足非劣效性验证标准 |
| <b>特地唑胺</b>                                           |                                                                    |                                                                            |                                                |                                                                                                                              |                                      |                          |              |                                                                   |
| ESTABLISH-1与STABLISH-2 <sup>23</sup>                  | 随机双盲双模拟多中心试验, ESTABLISH-1, 2010—2011年开展; ESTABLISH-2, 2011—2013年开展 | 特地唑胺200 mg/d连用6天比利奈唑胺600 mg 1天2次连用10天; ESTABLISH-1口服用药, ESTABLISH-2≥2次静脉注射 | ESTABLISH-1: ABSSSIs的成年患者; ESTABLISH-2: ≥12岁患者 | ITT (n=1 333): 平均年龄44岁;63%男性;25%脓肿形成; 46%蜂窝织炎;试验开始时细菌培养: 21.5%金黄色葡萄球菌感染; 4% GAS                                              | 48~72小时早期临床反应 <sup>24</sup>          | 研究者在治疗7天、EOT及PTE时判断治疗反应  | 非劣效性,界值10%   | 两个试验合并分析主要疗效终点:特地唑胺有效率81.6%比利奈唑胺79.4%, 95% CI-2.0~6.5, 满足非劣效性验证标准 |

注: GAS: A族链球菌; MRSA: 耐甲氧西林金黄色葡萄球菌; TOC: 试验治疗; EOT: 治疗终点; ITT: 治疗目的; ECE: 早期疗效评估; PTE: 治疗后评估。CI: 可信区间

<sup>19</sup>美国食品药品监督管理局(FDA)于2010年发表急性细菌性皮肤及皮肤结构感染(ABSSSI)药物治疗指南草案,2013年发表完成版指南。完成版指南中,主要疗效评价终点为48~72小时皮损对治疗有反应,即在患者未接受紧急治疗并仍存活的情况下,皮损面积与治疗前相比减少≥20%。次要疗效评价终点为治疗后ABSSSI皮损消退7~14天。

<sup>21</sup>复杂皮肤及皮肤结构感染(cSSSIs)定义为涉及更深层软组织的感染,需要有效的外科干预[大脓肿、烧伤、创伤或手术伤口感染,深层皮肤及软组织感染(SSTIs)如广泛/溃疡型蜂窝织炎]。

<sup>22</sup>急性细菌性皮肤及皮肤结构感染指蜂窝织炎、皮肤大脓肿或伤口感染,每种皮损红斑面积≥75 cm<sup>2</sup>。

<sup>23</sup>ESTABLISH-1对主要疗效终点的定义与试验开始时FDA制定的指南草案略有不同,合并数据发表于2015年根据完成版草案更新了评价终点的相关内容。



表2 抗生素治疗皮肤及软组织感染(SSTIs)的经济因素影响

| 药物                | 给药剂量                    | 根据给药剂量计算每日费用<br>(AWP*)(美元) | 根据标准剂量及疗程计算费用<br>(AWP*)(美元) |
|-------------------|-------------------------|----------------------------|-----------------------------|
| <b>新型药物</b>       |                         |                            |                             |
| 头孢洛林              | 600 mg, 1天2次, IV        | 366.24                     | 7天: 2 563.68                |
| 达巴万星 <sup>†</sup> | 1 500 mg, 1天2次, IV      | 383.14                     | 一个疗程: 5 363.96              |
| 达托霉素 <sup>‡</sup> | 500 mg, 1天1次, IV        | 534.59                     | 7天: 3 742.13                |
| 奥利万星              | 1 200 mg, 1天1次, IV      | 248.57                     | 一个疗程: 3 479.98              |
| 泰地唑胺              | 200 mg, 1天1次, IV        | 296.10                     | 6天: 1 776.60                |
|                   | 200 mg, 1天1次, PO        | 371.70                     | 6天: 2 230.10                |
| 泰拉万星 <sup>‡</sup> | 750 mg, 1天1次, IV        | 428.92                     | 7天: 3 002.44                |
| <b>旧药</b>         |                         |                            |                             |
| 头孢唑林              | 2 g/8 h, IV             | 198.00                     | 7天: 1 386.00                |
| 克林霉素              | 900 mg/8 h, IV          | 62.64                      | 7天: 438.48                  |
|                   | 300 mg/8 h, PO          | 7.14                       | 7天: 49.98                   |
| 强力霉素              | 100 mg, 1天2次, PO        | 12.30                      | 7天: 86.10                   |
| 利奈唑胺              | 600 mg, 1天2次, IV        | 192.00                     | 10天: 1 920.00               |
|                   | 600 mg, 1天2次, PO        | 368.00                     | 10天: 3 680.00               |
| 甲氧苄氨嘧啶/磺胺甲噁唑      | 160 mg/800 mg, 1天2次, PO | 2.30                       | 7天: 16.10                   |
| 万古霉素              | 1 000 mg/12 h, IV       | 30.96                      | 7天: 216.72                  |

注: IV=静脉注射; PO=口服

<sup>\*</sup>根据2016年3月6日美金汇率(1美元=0.79英镑; 0.94欧元)计算平均批发价格

<sup>†</sup>本表中根据每日花费计算, 将1个疗程定为2周

<sup>‡</sup>给药剂量接近药瓶大小

### 药代动力学和给药

泰地唑胺口服生物利用率>90%, 线性两室模型药代动力学提示, 中心和周围两室吸收<sup>45-46</sup>。体外试验中, 泰地唑胺是一种单胺氧化酶的可逆抑制剂, 然而与利奈唑胺不同, 其临床前研究缺乏与血清素调节剂的药物作用研究<sup>39</sup>。终末半衰期及分布容积>利奈唑胺, 泰地唑胺主要靠粪便排泄, 少部分通过肾脏排泄<sup>46</sup>, 在青少年人群中观察到相似的药代动力学结果<sup>47</sup>。

泰地唑胺已被EMA和FDA批准治疗ABSSSI(包括蜂窝织炎和皮肤脓肿)<sup>45</sup>, 剂量为200 mg, 口服或静脉给药, 每日1次, 肝肾功能损伤患者无需剂量调整<sup>48-49</sup>。

### 证据摘要

ESTABLISH-1和2 III期临床试验比较了泰地唑胺和利奈唑胺。ESTABLISH-1中, 随机选取667例蜂窝织炎、皮肤大脓肿或伤口感染患者, 试验组每日口服1次200 mg泰地唑胺, 连续6天, 对照组每日2次600 mg利奈唑胺, 连续口服10天。主要研究治疗开始48~72小时的早期临床疗效。结果表明界值为10%, 泰地唑胺疗效不劣于利奈唑胺。

早期和持续临床疗效无组间差异<sup>50</sup>。

ESTABLISH-2随机选取666例类似患者, 试验组每天泰地唑胺200 mg静脉给药, 为期6天。对照组利奈唑胺600 mg静脉给药, 每日2次, 为期10天, 两组中至少2次静脉给药后可选择口服降阶梯疗法。主要研究治疗开始48~72小时的早期临床疗效。结果表明界值为10%, 泰地唑胺疗效不劣于利奈唑胺。临床疗效在所有时间点都无组间差异<sup>51</sup>。值得注意的是, 临床不良反应[包括恶心( $P=0.02$ )、血小板减少症( $P<0.001$ )]与利奈唑胺组相比显著降低<sup>23</sup>。临床前研究表明, 即使泰地唑胺给药时间>6天, 其骨髓抑制和神经病变发生率也低于利奈唑胺<sup>52</sup>。

### 临床应用

泰地唑胺在抗菌谱和MOA方面与利奈唑胺类似, 然而优于利奈唑胺, 如给药方案更方便、不良反应小和药物相互作用少, 特别是与血清素调节剂相互作用少<sup>53</sup>。由于泰地唑胺可抑制毒素生成, 因此可治疗坏死性筋膜炎。这些特征可吸引临床医生使用泰地唑胺治疗有多种合并症的患者, 但需要考虑利奈唑胺的经济优势(表2)。对糖尿病患者合

并伤口感染以及儿科 ABSSSI 患者使用该药的临床研究将会开展<sup>54-55</sup>。

### 瑞他莫林 (Retapamulin)

#### 属性与抗菌活性

瑞他莫林是截短侧耳素类抗生素,通过与 50S 核糖体亚基的变构位点结合而发挥作用。其可改变肽基转移酶中心构象,抑制蛋白合成。因其变构结合可更有效的阻止耐药发生<sup>56</sup>。瑞他莫林对葡萄球菌和链球菌有抗菌活性,包括 MRSA 菌株。另有研究显示,其对丙酸杆菌属、梭杆菌属和其他革兰阳性菌均有抗菌活性<sup>57-58</sup>。

有研究发现,瑞他莫林对耐甲氧西林、夫西地酸或莫匹罗星金黄色葡萄球菌分离株,具有 99.9% 的抑制作用<sup>59</sup>。然而,2014 年金黄色葡萄球菌对瑞他莫林耐药性增加到 9.5%,其中超过 50% 的分离株同时对甲氧西林耐药,<1% 对利奈唑胺耐药,提示瑞他莫林耐药可能在 MSSA 和 MRSA 中缓慢增加<sup>60</sup>。瑞他莫林耐药主要是由 *rp1C* 基因突变产生,需要 3 个不同的突变以逐步显著降低细菌对药物的敏感性<sup>61</sup>。耐药菌株的生长率较低,使得更敏感、生长更快的菌株出现<sup>62</sup>。

#### 药代动力学和给药

瑞他莫林作为外用抗生素,血液吸收量很少。研究表明,使用推荐剂量时仅有 3%~11% 的患者可以在血液中检测到瑞他莫林<sup>63</sup>。

瑞他莫林经 FDA 批准治疗脓疱疮,EMA 批准其治疗脓疱疮和葡萄球菌皮肤感染<sup>63</sup>。建议感染部位局部薄层涂抹,每天 2 次,为期 5 天。由于各个系统吸收较少,在肝肾功能损伤患者中无需调整剂量。

#### 证据摘要

在一项随机双盲、17 个国际中心开展的 III 期临床研究中,随机选取 139 例脓疱疮患者接受瑞他莫林治疗,71 例接受安慰剂治疗,局部给药每日 2 次,连用 5 天。主要疗效评价终点是第 7 天监测的疗效。第 7 天的有效率显著不同,瑞他莫林组为 85.6% 而安慰剂组为 52.1% (33.5% 差异,95% 可信区间 20.5%~46.5%)。与安慰剂比较,最常见的不良反应为用药部位出现瘙痒(6.5% 比 1.4%)<sup>64</sup>。

一项 III 期非劣效性研究选取 519 例患者使用瑞他莫林或夫西地酸治疗脓疱疮。主要疗效评价终点显示,界值为 10%,在治疗结束时,瑞他莫林

疗效不劣于夫西地酸,两组治疗目的及入选人群无差异<sup>65</sup>,成人及儿童患者皆入组(年龄≥9 个月)。

在鼠伤口感染模型中,瑞他莫林外用与利奈唑胺口服相比,终点时主要疗效评价其细菌负荷减少更显著<sup>66</sup>。

#### 临床应用

瑞他莫林主要用于治疗轻中度全身感染症状轻微的脓疱疮。瑞他莫林特别适用于 MRSA 携带者或已知 MRSA 感染史的患者。因瑞他莫林为外用制剂,系统吸收较少,对于应用抗生素会出现全身性不良反应的患者(如腹泻)有其优势。也可用于治疗伤口感染,但需进一步研究。目前正在研究瑞他莫林减少 MRSA 经鼻携带传播<sup>67</sup>。

## III 期临床药物

### 奥泽杀星 (Ozenoxacin)

#### 药理学

奥泽杀星代表新一代非氟化的喹诺酮类抗生素,通过启动 DNA 促旋酶和拓扑异构酶 IV,影响 DNA 复制、转录、修复和重组发挥其 MOA<sup>68</sup>。与其他氟喹诺酮类抗生素相比,奥泽杀星对革兰阳性菌具有更强的杀菌活性,其中包括 MRSA、CoNS 和链球菌菌种<sup>69</sup>。奥泽沙星的耐药性因分别编码 DNA 促旋酶和拓扑异构酶 IV 的 *gyrA* 和 *grlA* 基因突变导致。有意义的是,仅 *grlA* 突变未产生耐药性,而 *grlA-gyrA* 双突变体和 *grlA-gyrA* 三重突变体使金黄色葡萄球菌耐药,但仍低于其他氟喹诺酮类抗生素<sup>68</sup>。

在一项 I 期开放标签临床研究中,46 例患者(包括成人和儿童)中仅有 4 个样本血液中检测到奥泽沙星,提示奥泽沙星局部用药系统吸收少<sup>70</sup>。另 1 项 I 期试验局部外用 2% 奥泽杀星,每天 1 次或 2 次。结果表明,药物不能很好地渗入真皮,第 3 天可达到稳定状态,皮肤内药物浓度与局部外用药物总量呈线性相关<sup>71</sup>。

#### 证据摘要

日本已批准浓度为 2% 奥泽沙星外用制剂治疗表皮皮肤感染,其他国家包括美国和欧洲仍在评估浓度为 1% 的制剂<sup>72</sup>。III 期临床试验随机选取 465 例患者,脓疱疮史>2 年,试验组使用 1% 奥泽沙星乳膏,对照组使用安慰剂或瑞他莫林软膏,疗程皆为每天 2 次,连用 5 天。主要疗效评价终点是治



疗结束时成功或失败,奥泽沙星乳膏临床成功率(34.8%)明显高于安慰剂组19.2%( $P=0.003$ );瑞他莫林的临床成功率(37.7%)与奥泽沙星相似<sup>73</sup>。奥泽沙星在研究中耐受性好,不良反应较少。

#### 临床应用

奥泽沙星的治疗地位与包括瑞他莫林在内的其他外用药剂相似。奥泽沙星的一个优点是它代表了新一代喹诺酮抗菌药,细菌耐药性尚未形成。此外,其MOA与其他新型外用抗菌药不同,从而在耐药率不断增高的情况下增加了外用抗菌药的多样性。迄今为止所有登记在册的临床试验已经完成。

### 艾拉普林(Iclaprim)

#### 药理学

艾拉普林是一种二氨基嘧啶衍生物,细菌二氢叶酸还原酶抑制剂。通过抑制二氢叶酸还原酶使得核苷短缺,影响DNA合成从而导致细菌死亡<sup>74</sup>。艾拉普林的革兰阳性菌抗菌谱较广包括MRSA、VISA、VRSA、CONS,链球菌和粪肠球菌。对非典型微生物和一些肠杆菌科细菌也有抗菌活性<sup>74</sup>,艾拉普林的半衰期是3小时,可广泛分布于整个组织中,口服和静脉注射制剂均在研发。

#### 证据摘要和临床应用

ASSIST-1和ASSIST-2两个Ⅲ期临床试验,评估了艾拉普林治疗cSSSI疗效。两项研究中皆给予成人艾拉普林静脉注射0.8 mg/kg/12h或利奈唑胺静脉注射600 mg/12h,疗程10~14天<sup>74</sup>。治疗结束时,治愈率显示艾拉普林不劣于利奈唑胺。艾拉普林总体耐受性较好,两组不良事件发生率差异不大,艾拉普林组相关不良反应发生率为6.0%,利奈唑胺为9.4%<sup>74</sup>。

有报道,服用艾拉普林可使QT间期一过性延长4~6 ms<sup>74</sup>。QT间期延长虽未导致心血管不良事件发生,但对于治疗前有QT间期延长史的患者及正在服用可能延长QT间期药物的患者应慎用<sup>74</sup>。2008年和2009年FDA和EMA分别拒绝批准艾拉普林上市,要求更多临床研究证明其功效。

两项新的治疗ABSSSI的Ⅲ期临床研究,REVIVE-1和REVIVE-2正在招募患者中<sup>75-76</sup>。值得注意的是,艾拉普林正在以固定剂量进行研究,即静脉用药80 mg/12h,与之前研究中的0.8 mg/kg不同。因其有口服和静脉给药两种剂型,以及对甲氧苄啶耐药菌有抗菌活性,艾拉普林将是治疗SSTIs

很好的选择<sup>74</sup>。

### Brilacidin

#### 药理学

Brilacidin是防御素模拟物这个新型抗生素家族的第一个成员,其为阳离子、疏水分子。作用机制类似宿主固有防御蛋白。与达托霉素相似,Brilacidin对金黄色葡萄球菌细菌膜去极化作用呈剂量依赖性。抗菌谱广,包括MRSA和VRE<sup>77</sup>。

Brilacidin药代动力学呈浓度依赖的线性抗菌活性<sup>78</sup>。一次给药半衰期长达15~23小时,并具有抗生素后延迟效应,还具有抗炎作用,在细菌生长的稳定期可能也有活性,使其可用于生物膜感染。MOA提示很难产生耐药性。

#### 证据摘要和临床应用

针对300多例ABSSI患者的BrilacidinⅡ期临床试验已经完成<sup>78</sup>。在Ⅱb期,两种单次给药治疗方案(0.6 mg/kg静脉给药×1次和0.8 mg/kg静脉给药×1次)和一种3次序贯给药治疗方案(0.6 mg/kg×1次,0.3 mg/kg×2次)与达托霉素0.2 mg/kg静脉给药进行比较,疗程7天。3个brilacidin给药方案均遵循FDA早期临床反应终点标准(48~72小时出现)及EMA持续临床反应终点标准(7~8天和10~14天)。brilacidin耐受性良好。

所有用于Ⅱb研究的brilacidin用药剂量均低于Ⅱa研究,而且耐受性更好,感觉异常和感觉迟钝出现更少。这些不良反应与神经毒性无关,据报道,多呈急性发作并迅速缓解。高血压有可能是其不良反应,呈剂量依赖性和瞬时性。ABSSSI的Ⅲ期临床研究在计划中<sup>78</sup>。

Brilacidin因MOA不同、抗耐药性强,同时具有良好的疗效及安全性,使其成为治疗SSTI受欢迎药物。目前用于黏膜、眼部及耳部的剂型正在研发中<sup>79</sup>。

### 德拉沙星(Delafloxacin)

#### 药理学

德拉沙星是一种新型阴离子(非两性离子)喹诺酮类抗菌药,同样抑制DNA促旋酶和拓扑异构酶Ⅳ<sup>80</sup>。相比针对革兰阳性菌(包括MSSA和MRSA)的其他氟喹诺酮类,效能更高,特别是在酸性环境中<sup>81-82</sup>。德拉沙星具有其他氟喹诺酮类抗菌药类似的革兰阴性抗菌谱,同时对厌氧菌有抗菌活

性<sup>83</sup>。MOA显示,gyrA和glrA基因突变可导致耐药。此外,可能由于C-7和C-8结构位置的R基团,德拉沙星体外研究不易选择突变菌株<sup>81</sup>。

3项对健康志愿者静脉给药的I期临床试验研究了其安全性、耐受性和药代动力学<sup>84</sup>。另有两项研究进行口服给药<sup>85</sup>。其终末半衰期在静脉给药后1小时,口服给药后6~8小时;在后一项研究中,增多给药剂量可增加其半衰期。第3天可达血药浓度稳定状态。食物对药物吸收没有显著影响,其2/3通过尿液排出,1/3通过粪便,主要以原型排出体外<sup>86</sup>。

研究还发现,德拉沙星耐受性好,最常见的不良反应是胃肠道胀气,剂量 $\geq 800$  mg时胀气症状出现频繁。值得注意的是,与其他氟喹诺酮类药物相比,德拉沙星不影响QT间期<sup>87</sup>。

#### 证据摘要

两项II期临床研究比较了德拉沙星与替加环素、万古霉素及利奈唑胺对SSTIs患者的疗效<sup>88-89</sup>。第一项临床研究随机选取150例cSSTIs患者(包括伤口感染,脓肿和蜂窝织炎),并在末次给药后14~21天通过治愈试验检测治愈率。发现德拉沙星300 mg、德拉沙星450 mg与替加环素标准剂量相比,治愈率差异无统计学意义,治愈率分别为94.3%、92.5%和91.2%。治疗相关的不良反应率分别为44.9%、62.7%和72.0%,德拉沙星组最低。

另一项临床研究随机选取256例ABSSSI患者(包括蜂窝织炎、伤口感染、脓肿或烧伤感染),随访时检测治愈率。研究发现与万古霉素相比,德拉沙星治愈率明显提高(70.4%比54.1%; $P=0.031$ ),德拉沙星与利奈唑胺治愈率差异无统计学意义(70.4%比64.9%; $P=0.496$ )。德拉沙星有关的不良反应主要是轻度胃肠道反应,类似之前的I期临床研究。德拉沙星、利奈唑胺和万古霉素至少有一个不良反应的发生比例,分别为74.4%、72.0%、64.6%。

#### 临床应用

由于德拉沙星抗菌谱广并可对抗多重耐药的金黄色葡萄球菌,可用于治疗多种微生物感染及难治性感染。其他优点包括有口服和静脉制剂两种剂型,不影响QT间期。下一步的研究需确认其安全性,尤其治疗梭菌感染的安全性。该药针对SSTIs的III期临床试验已经完成,尚在分析阶段,即将发布<sup>90-91</sup>。

## Avarofloxacin

### 药理学

Avarofloxacin是一种广谱的氟喹诺酮抗菌药,类似其他氟喹诺酮类,作用于DNA回旋酶和拓扑异构酶IV。然而,该药对MRSA有很强的杀菌活性,包括氟喹诺酮耐药菌株,现正被开发用于治疗ABSSIs<sup>92</sup>。一项II期临床试验中,该药对于MIC值 $\leq 0.25$  g/ml的金黄色葡萄球菌分离株有抗菌活性<sup>93</sup>。由于Avarofloxacin对DNA促旋酶和拓扑异构酶IV的抑制活性类似,所以两个酶基因位点均突变才可能产生耐药菌株<sup>94</sup>。

通过对健康志愿者进行安慰剂对照、双盲和开放标签I期临床试验发现,该药的半衰期为12.9~16.7小时,口服生物利用率为66%,静脉给药可耐受150 mg每日2次的剂量。可出现胃肠道不良反应,疼痛和接触性皮炎是最显著的不良反应。静脉给药不良反应与口服给药相似。

#### 证据摘要

一项II期随机、双盲、多中心、非劣性临床研究选取161例ABSSSI患者使用Avarofloxacin或利奈唑胺治疗<sup>95</sup>。主要疗效评估终点时界值为15%,Avarofloxacin不劣于利奈唑胺。在首次分析中,Avarofloxacin不符合非劣效性标准;然而,之后使用2010年FDA指导标准和终点标准(无疾病传播和发热)显示,该药与利奈唑胺比较有非劣效性(61.4%比57.5%; $P=0.024$ )<sup>96</sup>。

#### 临床应用

目前仅有II期临床数据,III期临床试验发布前尚不能确定该药适应证。就目前结果而言,因两者均为强效、广谱、抗MRSA氟喹诺酮类药物,该药与德拉沙星有竞争潜力。

## Omadacycline

### 药理学

Omadacycline是一种米诺环素半合成衍生物。它是新型9-氨基环素类药物的第一个成员,是类四环素药物的临床研究产物。与其他四环素类药物一样可抑制蛋白合成,同时可结合细菌核糖体<sup>97</sup>。Omadacycline抗菌谱广,包括革兰阳性菌、非典型菌和厌氧病原体<sup>98</sup>。它对多重耐药菌也有抗菌活性,包括MRSA和VRE<sup>97-98</sup>。类似于替加环素,Omadacycline也存在细菌外排泵和核糖体保护四环素耐药基因。

该药生物利用率高,有静脉和口服制剂。在Ⅰ期研究中,通过肾和胃肠道途径排泄,在尿液中可见高浓度原药,未发现药物代谢物<sup>98</sup>。

#### 证据摘要和临床应用

在Ⅱ期研究中,该药与利奈唑胺治疗cSSTI效果类似,且耐受性好,其最常见的不良反应是胃肠道胀气(18.9% Omadacycline, 18.5% 利奈唑胺)<sup>99</sup>。另一项Ⅱ期临床研究正比较该药与利奈唑胺治疗ABSSSI<sup>100</sup>。因其抗菌谱广且具有口服制剂,将来Omadacycline可能用于治疗耐药菌导致的SSTIs。

### 磷霉素 (Fosfomycin)

#### 药理学

磷霉素是一种磷酸抗生素,能抑制参与细菌细胞壁肽聚糖早期合成的磷酸烯醇丙酮酸转移酶的作用<sup>101</sup>。磷霉素具有广谱抗菌性,包括MRSA、VRE、耐药肠杆菌和假单胞菌。在美国,磷霉素氨基丁三醇的口服制剂被批准治疗泌尿道感染。除泌尿道疾病外,为避免耐药,一些美国之外的国家批准磷霉素静脉制剂可联合其他抗菌药物用于临床。几种耐药机制已明确,包括靶点修饰,细胞摄取降低和磷霉素耐药激酶的失活<sup>101-102</sup>。

静脉注射磷霉素可广泛分布全身组织,且不经明显代谢。磷霉素的半衰期为2小时。高龄或伴有严重疾病的患者可延长至3.6~3.8小时<sup>103</sup>。磷霉素的排泄主要通过肾脏,半衰期与肾功能不全的程度成正比<sup>103</sup>。根据适应证不同,其标准剂量在12~24 g范围内,2~4次给药,肾功能受损患者需要调整剂量<sup>103</sup>。

#### 证据摘要和临床应用

磷霉素有以下几个特征,可以使其静脉制剂作为治疗SSTIs的理想研究对象。包括抗菌谱广;糖尿病足感染后静脉注射磷霉素可在骨和外周软组织中达到高血药浓度;治疗MRSA时与利奈唑胺有协同作用<sup>104-105</sup>;有免疫调节作用,包括减少炎症细胞因子,体外抑制B细胞和T细胞的活化,并改善一些细菌的易感性<sup>106</sup>;另外,磷霉素有助于减轻糖肽的肾毒性,故常用于SSTI的治疗<sup>106</sup>。

### 头孢比普 (Ceftibiprole)

#### 药理学

头孢比普是头孢菌素类广谱抗生素,以强亲和力结合青霉素结合蛋白,从而抑制细菌细胞壁合成,包括PBP2a结合蛋白,该蛋白可能与携带mecA

基因的金黄色葡萄球菌的耐药性产生有关<sup>107</sup>。头孢比普对革兰阳性菌(包括MRSA、青霉素耐药链球菌、粪肠球菌)、革兰阴性菌(包括易感性假单胞菌)和一些厌氧菌具有抗菌活性。具有杀菌活性,耐药发生可能性小。

其静脉制剂是头孢比普洛酯钠,一种前体药,可通过血浆酯酶迅速转化为头孢比普<sup>107</sup>。由于其代谢少且与蛋白结合率低(16%),因此药物相互作用不常见<sup>106</sup>。头孢比普通过肾脏以原药排泄,半衰期为3小时<sup>107</sup>。

#### 证据摘要

已完成两项关于cSSSI的Ⅲ期临床试验,第一项是成人多中心、随机、双盲试验,比较头孢比普500 mg/12 h静脉注射与万古霉素1 000 mg/12 h静脉注射的疗效<sup>108</sup>。主要结果是治疗结束后7~14天的治愈率。与万古霉素相比,头孢比普具有非劣效性。第二项研究是针对成人cSSSI的多中心、随机、双盲试验,比较不同剂量的头孢比普疗效,分别为头孢比普500 mg/8 h静脉滴注,每次静脉滴注2小时;万古霉素1 000 mg/12 h + 头孢他啶1 000 mg/8 h静脉滴注<sup>108</sup>。主要结果是治疗结束后7~14天的治愈率,并再次得出头孢比普具有非劣效性。在两项研究中,最常见的不良反应是胃肠道症状和头痛,各组间差异无统计学意义<sup>108-109</sup>。

#### 临床应用

由于临床药理基地检查审核时发现一些无法解释的数据,导致目前为止,头孢比普未获得FDA批准。然而,被FDA授予为传染性疾病的合格药物,Ⅲ期临床试验正在美国再次开展<sup>107,110</sup>。加拿大已批准使用头孢比普治疗cSSSI,500 mg/12 h静脉给药,肾功能受损患者需要调整剂量<sup>111</sup>。头孢比普已被13个欧洲国家及澳大利亚批准治疗社区和医院获得性肺炎。由于其广谱抗菌性,头孢比普将可能用于治疗严重性SSTIs,它将是第一个同时针对MRSA和耐受性铜绿假单胞菌的β内酰胺类药物。

## Ⅱ期临床药物

### Lefamulin

#### 药理学

Lefamulin(原名BC-3781),半合成截短侧耳素类抗生素,通过结合核糖体肽基转移酶中心从而抑制细菌蛋白质生成<sup>112</sup>。在开发Lefamulin的静脉和



口服制剂前,唯一可用于人体的截短侧耳素类抗生素是瑞他莫林外用制剂。Lefamulin的抗菌谱包括革兰阳性菌如葡萄球菌(包括MRSA)、链球菌和肠球菌(包括VRE),以及嗜血杆菌、黏膜炎莫拉菌和非典型菌<sup>112</sup>。

#### 证据摘要和临床应用

II期临床试验为针对成年住院ABSSSI患者的双盲多中心研究,Lefamulin 100 mg/12 h或150 mg/12 h静脉给药与万古霉素1 000 mg/12h静脉给药比较<sup>113</sup>。主要结果是治疗7~14天后测试临床治疗成功率。所有治疗组的临床成功率具有可比性,lefamulin总体耐受性好,患者最常见的不良反应是恶心、头痛及腹泻。Lefamulin是第一个系统用药的截短侧耳素类抗生素,其口服和静脉制剂将有优势。

#### Auriclosene

##### 药理学

Auriclosene(原名NVC-422),aganocide类复合物。是首次人工合成的稳定的氯牛磺酸衍生物类,可优先灭活细菌表面蛋白氨基酸中的硫基团,起到杀菌作用。具有广谱抗菌性,包括多重耐药菌MRSA和VRE<sup>114-115</sup>。由于auriclosene可作用于多种表面蛋白(细胞膜或细胞壁),细菌很难产生耐药性。

#### 证据摘要和临床应用

对129例2~12岁患非大疱性脓疱疮儿童进行II期临床研究,比较了3个不同浓度的auriclosene(0.1%、0.5%和1.5%),一日3次,连续7天外用的疗效<sup>114</sup>。临床疗效定义为治疗结束时(第8天)/第15天随访时85%的患者临床成功或改善。不良反

应罕见,包括瘙痒和皮疹。Auriclosene是一种新型药物,为轻度SSTIs的局部治疗提供选择。

## 结论

SSTIs给患者及健康护理系统增加大量负担,特别是金黄色葡萄球菌耐药性增强,给医护人员带来挑战。由于2014年ISDA SSTI指南发布时,本综述中介绍的一些抗生素刚获得批准或正处于临床研发阶段,因此未确定其在治疗SSTI中的地位。许多新的治疗药物安全方便。几种药物作用机制较新,对耐药菌有抗菌活性。另外,SSTIs患者可以选用更多性价比高的口服制剂。近期一些研究经过多年临床观察,继续支持口服制剂,如克林霉素和甲氧苄啶/磺胺甲噁唑治疗轻-中度SSTIs<sup>116-117</sup>。医师应认真考虑患者具体情况,选择合适的个体化SSTIs治疗方案。虽然治疗SSTI的药物增加让人兴奋,但我们必须认真负责地使用这些药物,以确保其疗效。

贡献者(Contributors): JGB did the literature search. SLM, JGB, and DLS wrote the draft article and revised the manuscript. SLM is the guarantor.

利益竞争(Competing interests): We have read and understood the BMJ policy on declaration of interests and declare the following interests: none.

来源与同行评议(Provenance and peer review): Commissioned; externally peer reviewed.

患者参与(Patient involvement): Owing to the technical nature of this review, patient involvement was not requested by BMJ.

参考文献见bmj.com或bmj.yiigle.com

BMJ takes no responsibility for the accuracy of the translation from the published English language original and is not liable for any errors that may occur.

# BMJ
